# Supplementary material for: Three-Year Outcomes of Orbital Atherectomy for the Endovascular Treatment of Infrainguinal Claudication or Chronic Limb-Threatening Ischemia
Source: PubMed Central journal article supplement — J Endovasc Ther. 2020 Jul 3;27(5):714–25. doi: 10.1177/1526602820935611 (PMC7545657; doi:10.1177/1526602820935611), 2020-07-03
Supplement: 19-0584_supplementary_materals.pdf [file 19-0584_supplementary_materals.pdf]

### Three-Year Outcomes of Orbital Atherectomy for the Endovascular Treatment of Infrainguinal Claudication or Chronic Limb-Threatening Ischemia

Stefanos Giannopoulos et al. *J Endovasc Ther.* 2019;27(5).

**Supplementary Table 1.** Crown Sizes of the Atherectomy Devices.<sup>a</sup>

| Diamondback/Stealth Crown Type | RC 2/3: Claudicants (n=214) | RC 4/5: CLTI (n=233) | RC 6: CLTI (n=56) | p      |
|--------------------------------|-----------------------------|----------------------|-------------------|--------|
| 1.5 Classic                    | 26 (12.1)                   | 14 (6.0)             | 9 (16.1)          | 0.018  |
| 2.0 Classic                    | 32 (15.0)                   | 17 (7.3)             | 2 (3.6)           | 0.008  |
| 1.25 Solid                     | 41 (19.2)                   | 66 (28.3)            | 8 (14.3)          | 0.02   |
| 1.5 Solid                      | 51 (23.8)                   | 49 (21.0)            | 7 (12.5)          | 0.179  |
| 2.0 Solid                      | 19 (8.9)                    | 12 (5.2)             | 1 (1.8)           | 0.108  |
| 1.25 Solid Micro               | 39 (18.2)                   | 59 (25.3)            | 12 (21.4)         | 0.195  |
| 1.25 Micro                     | 19 (8.9)                    | 32 (13.7)            | 22 (39.3)         | <0.001 |
| Unknown                        | 0                           | 1 (0.4)              | 0                 | —      |

Abbreviation: CLTI, chronic limb-threatening ischemia; RC, Rutherford category.

<sup>a</sup>Data are given as the number (percentage).

### Three-Year Outcomes of Orbital Atherectomy for the Endovascular Treatment of Infrainguinal Claudication or Chronic Limb-Threatening Ischemia

Stefanos Giannopoulos et al. *J Endovasc Ther.* 2019;27(5).

**Supplementary Table 2.** Short-term Outcomes and Angiographic Complications.<sup>a</sup>

| Outcomes                          | RC 2/3 vs RC 4/5            | RC 2/3 vs RC 6)             | RC 4/5 vs RC 6               |
|-----------------------------------|-----------------------------|-----------------------------|------------------------------|
| Per patient                       |                             |                             |                              |
| Procedure success <sup>b</sup>    | 1.28 (0.78 to 2.09) p=0.325 | 1.69 (0.82 to 3.50) p=0.157 | 1.32 (0.65 to 2.69) p=0.440  |
| Severe angiographic complications | 0.81 (0.44 to 1.50) p=0.510 | 0.60 (0.25 to 1.44) p=0.249 | 0.73 (0.31 to 1.72) p=0.476  |
| Per lesion                        |                             |                             |                              |
| Lesion success <sup>b</sup>       | 1.22 (0.77 to 1.93) p=0.387 | 1.38 (0.71 to 2.68) p=0.342 | 1.13 (0.59 to 2.15) p=0.714  |
| Severe angiographic complications | 0.81 (0.46 to 1.43) p=0.477 | 0.65 (0.30 to 1.45) p=0.294 | 0.80 (0.38 to 1.72) p=0.572  |
| Severe dissection (types C-F)     | 0.65 (0.19 to 2.26) p=0.500 | 0.56 (0.11 to 3.38) p=0.569 | 0.93 (0.19 to 4.57) p=0.930  |
| Perforation                       | 0.38 (0.08 to 1.89) p=0.237 | 0.61 (0.05 to 6.82) p=0.689 | 1.61 (0.19 to 13.6) p=0.661  |
| Distal embolization               | 1.16 (0.57 to 2.37) p=0.681 | 0.81 (0.30 to 2.14) p=0.664 | 0.69 (0.26 to 1.84) p=0.461  |
| Abrupt closure                    | 0.16 (0.02 to 1.32) p=0.089 | 0.30 (0.02 to 4.92) p=0.402 | 1.89 (0.23 to 15.57) p=0.556 |

Abbreviations: RC: Rutherford category.

<sup>a</sup>Data are presented as the odds ratio (95% CI).

<sup>b</sup>Success defined as <50% residual stenosis, without significant angiographic complications.
